# Supplementary material for: Using Social Media to Recruit Seldom-Heard Groups: Reaching Women and Girls with Experience of Violence in Iran
Source: MDPI journal article supplement (doi:10.3390/socsci13050246), 2024-04-30
Supplement: s1 [file s1]

**Supplementary Table S1. Questions' wording, response options, and definition of variables, the 2022 Iran Online VAWG Survey.**

| Question/variable                                                                                                 | Response options                                                                                                                                                                                                                                                                             |
|-------------------------------------------------------------------------------------------------------------------|----------------------------------------------------------------------------------------------------------------------------------------------------------------------------------------------------------------------------------------------------------------------------------------------|
| <b>Abuse</b>                                                                                                      |                                                                                                                                                                                                                                                                                              |
| Have you ever been abused?                                                                                        | Yes, No                                                                                                                                                                                                                                                                                      |
| What form did the abuse take?                                                                                     | Inappropriate touching, Insult (verbal abuse), Catcalling, Intimidation /Threat, Sexting (receiving inappropriate pictures or videos of sexual nature), Texting (receiving unwanted/inappropriate text messages), Receiving harassing/unwanted phone calls<br>Multiple choices were allowed. |
| Where did the abuse happen?                                                                                       | Home, Workplace, School/university, Street<br>Social media<br>Respondents were able to choose maximum two options.                                                                                                                                                                           |
| Who did this to you?                                                                                              | A known person, a stranger, both                                                                                                                                                                                                                                                             |
| <b>Domestic violence (DV)</b>                                                                                     |                                                                                                                                                                                                                                                                                              |
| Have you ever been subjected to domestic violence?                                                                | Yes, No                                                                                                                                                                                                                                                                                      |
| What was the form of DV?                                                                                          | Beating up, Sexual abuse, Insult (verbal harassment/abuse)<br>Threat, Humiliation<br>Multiple choices were allowed.                                                                                                                                                                          |
| Who did this to you?                                                                                              | Father, Husband, Brother, None.<br>Respondents could choose any options that applied to them.                                                                                                                                                                                                |
| <b>Forced unemployment</b>                                                                                        |                                                                                                                                                                                                                                                                                              |
| Have you been forced to give up on employment? If yes, who forced you? Based on what reason you have been forced? | Drop-down menu list of options (respondent could only choose one response option): Family forced me, Husband forced me, Due to abuse at workplace                                                                                                                                            |
| <b>Depression</b>                                                                                                 |                                                                                                                                                                                                                                                                                              |
| Are you (currently) feeling depressed or down?                                                                    | Five-point scale from 1 Not at all, 2 Slightly, 3 Moderately, 4 Quite a bit, 5 Extremely                                                                                                                                                                                                     |
| <b>Suicidal ideation</b>                                                                                          |                                                                                                                                                                                                                                                                                              |
| Have you ever thought about ending your life?                                                                     | Five-point scale from 1 Never 2 Rarely 3 Sometimes 4 Often 5 Always                                                                                                                                                                                                                          |
| <b>Marital satisfaction</b>                                                                                       |                                                                                                                                                                                                                                                                                              |
| How satisfied are you with your marriage?                                                                         | Five-point scale from 1 (Very Dissatisfied), 2 (Dissatisfied), 3 (Neither Satisfied nor Dissatisfied), 4 (Satisfied), 5 (Very Satisfied).                                                                                                                                                    |
